# Supplementary material for: Improved Production of 5-Hydroxymethylfurfural in Acidic Deep Eutectic Solvents Using Microwave-Assisted Reactions
Source: MDPI journal article supplement (doi:10.3390/ijms23041959), 2022-02-10
Supplement: s1 [file s1]

## **Supporting Information**

### **Improved production of 5-hydroxymethylfurfural in acidic deep eutectic solvents using microwave-assisted reactions**

Eduarda S. Morais<sup>1</sup>, Mara G. Freire<sup>1</sup>, Carmen S.R. Freire<sup>1</sup> and Armando J. D. Silvestre<sup>1\*</sup>

<sup>1</sup>*CICECO – Aveiro Institute of Materials, Chemistry Department, University of Aveiro, Portugal;*

*\*Corresponding author: E-mail address: armsil@ua.pt; Tel: +351 234370701*

### Process optimization – response surface methodology (RSM)

In a  $2^k$  surface response methodology there are  $k$  factors that contribute to a different response, and the data are treated by a second order polynomial equation according to equation S1:

$$y = \beta_0 + \sum \beta_i X_i + \sum \beta_{ii} X_i^2 + \sum_{i < j} \beta_{ij} X_i X_j \quad (S1)$$

where  $y$  is the response variable and  $\beta_0, \beta_i, \beta_{ii}$  and  $\beta_{ij}$  are the adjusted coefficients for the intercept, linear, quadratic and interaction terms, respectively, and  $X_i$  and  $X_j$  are independent variables. This model allows the drawing of surface response curves and through their analysis the optimal conditions can be determined (1). The  $2^3$  factorial planning has been defined by the central point (zero level), the factorial points (1 and -1, level one) and the axial points (level  $\alpha$ ) The axial points are encoded at a distance  $\alpha$  from the central point, according to equation S2:

$$\alpha = (2^k)^{1/4} \quad (S2)$$

**Table S1.** 2<sup>3</sup> factorial planning.

| Experiment | $\chi_1$ | $\chi_2$ | $\chi_3$ |
|------------|----------|----------|----------|
| 1          | -1       | -1       | -1       |
| 2          | 1        | -1       | -1       |
| 3          | -1       | 1        | -1       |
| 4          | 1        | 1        | -1       |
| 5          | -1       | -1       | 1        |
| 6          | 1        | -1       | 1        |
| 7          | -1       | 1        | 1        |
| 8          | 1        | 1        | 1        |
| 9          | -1.68    | 0        | 0        |
| 10         | 1.68     | 0        | 0        |
| 11         | 0        | -1.68    | 0        |
| 12         | 0        | 1.68     | 0        |
| 13         | 0        | 0        | -1.68    |
| 14         | 0        | 0        | 1.68     |
| 15         | 0        | 0        | 0        |
| 16         | 0        | 0        | 0        |
| 17         | 0        | 0        | 0        |
| 18         | 0        | 0        | 0        |
| 19         | 0        | 0        | 0        |
| 20         | 0        | 0        | 0        |

$\chi_1$  – time;  $\chi_2$  – temperature;  $\chi_3$  – GVL concentration;

**Table S2.** Experimental data attained.

| Experiment | $\chi_1$ | $\chi_2$ | $\chi_3$ | HMF yield (%) |
|------------|----------|----------|----------|---------------|
| 1          | 2.0      | 120.0    | 5.00     | 75.19         |
| 2          | 4.0      | 120.0    | 5.00     | 85.72         |
| 3          | 2.0      | 140.0    | 5.00     | 67.94         |
| 4          | 4.0      | 140.0    | 5.00     | 81.78         |
| 5          | 2.0      | 120.0    | 15.00    | 93.16         |
| 6          | 4.0      | 120.0    | 15.00    | 80.80         |
| 7          | 2.0      | 140.0    | 15.00    | 68.82         |
| 8          | 4.0      | 140.0    | 15.00    | 69.18         |
| 9          | 1.3      | 130.0    | 10.00    | 44.18         |
| 10         | 4.7      | 130.0    | 10.00    | 94.65         |
| 11         | 3.0      | 113.2    | 10.00    | 66.84         |
| 12         | 3.0      | 146.8    | 10.00    | 73.44         |
| 13         | 3.0      | 130.0    | 1.60     | 70.80         |
| 14         | 3.0      | 130.0    | 18.40    | 80.67         |
| 15         | 3.0      | 130.0    | 10.00    | 86.81         |
| 16         | 3.0      | 130.0    | 10.00    | 90.21         |
| 17         | 3.0      | 130.0    | 10.00    | 84.10         |
| 18         | 3.0      | 130.0    | 10.00    | 90.84         |
| 19         | 3.0      | 130.0    | 10.00    | 83.57         |
| 20         | 3.0      | 130.0    | 10.00    | 81.33         |

$\chi_1$  – time;  $\chi_2$  – temperature;  $\chi_3$  – GVL concentration;

**Table S3.** Coded levels of independents variables used in the first and second factorial planning.

| Studied parameters | Symbol | Level  |           |         |           |       |
|--------------------|--------|--------|-----------|---------|-----------|-------|
|                    |        | Axial  | Factorial | Central | Factorial | Axial |
|                    |        | -1.68  | -1        | 0       | 1         | 1.68  |
| Time (min)         | t      | 1.3    | 2.0       | 3.0     | 4.0       | 4.7   |
| Temperature (°C)   | T      | 113.20 | 120.0     | 130.0   | 140.0     | 146.8 |
| GVL (wt.%)         | GVL    | 1.6    | 5.0       | 10.0    | 15.0      | 18.4  |

**Table S4.** Regression coefficients of the predicted second-order polynomial model from factorial planning for the dependable variable of 5-HMF yield.

|                          | Regression coefficients | Standard deviation | t-student (10) | P-value |
|--------------------------|-------------------------|--------------------|----------------|---------|
| Interception             | 85.91                   | 4.216              | 20.373         | < 0.05  |
| Time                     | 7.121                   | 2.799              | 2.544          | 0.237   |
| Time <sup>2</sup>        | -4.4522                 | 2.728              | -1.632         | 0.133   |
| Temperature              | -2.643                  | 2.799              | -0.944         | < 0.05  |
| Temperature <sup>2</sup> | -4.194                  | 2.728              | -1.537         | 0.155   |
| GVL                      | 1.312                   | 2.799              | 0.468          | 0.649   |
| GVL <sup>2</sup>         | -2.213                  | 2.728              | -0.811         | 0.436   |
| Time × Temperature       | 2.004                   | 3.655              | 0.548          | 0.595   |
| Time × GVL               | -4.546                  | 3.655              | -1.243         | 0.241   |
| GVL × Temperature        | -3.0970                 | 3.6552             | -0.847         | 0.416   |

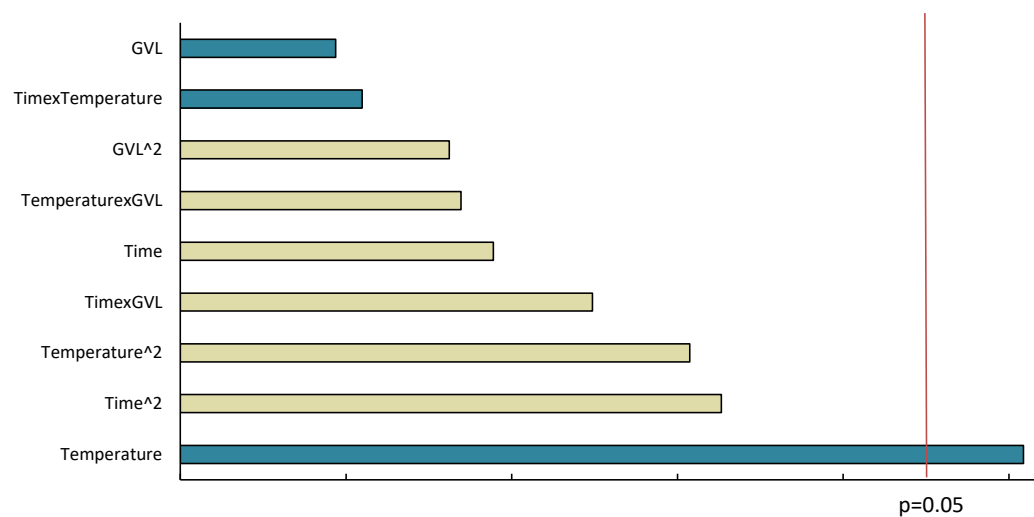

**Figure S1.** Pareto chart for the standardized main effects (positive (■) and negative (■)) in the factorial planning for furfural yield optimization. Vertical line indicates the statistical significance of the effects.

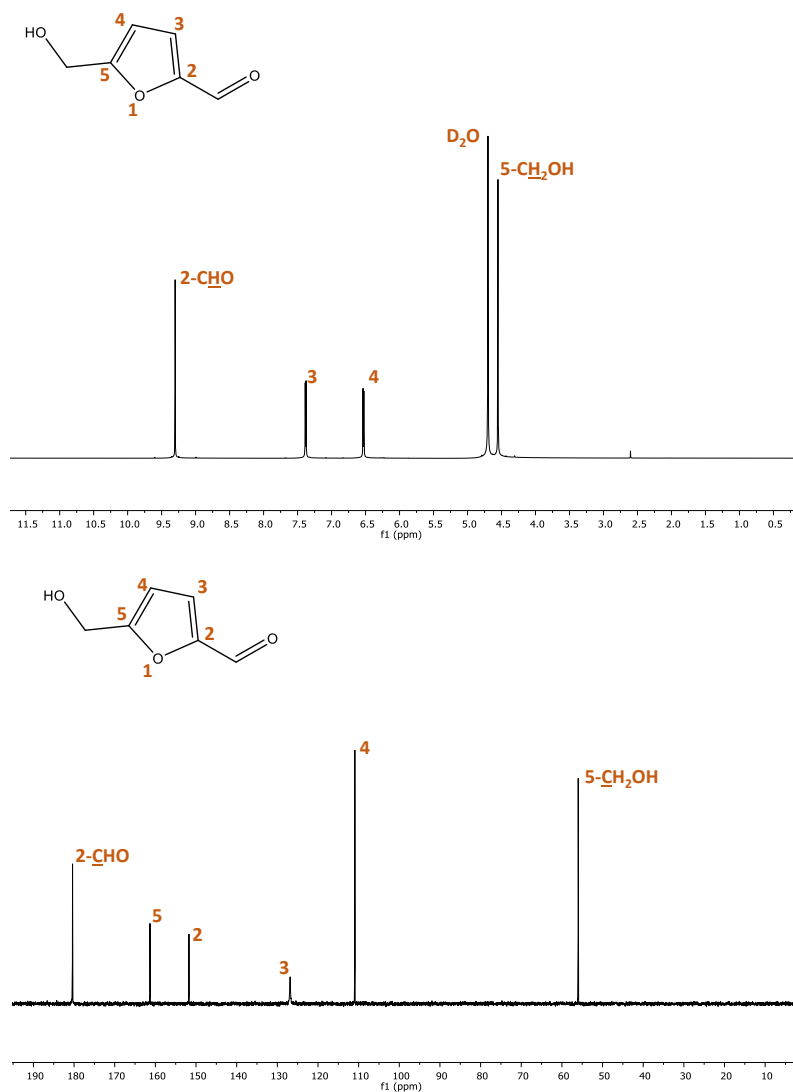

**Figure S2.**  $^1\text{H}$  and  $^{13}\text{C}$  NMR spectra of the recovered 5-HMF.

$^1\text{H}$  NMR (D<sub>2</sub>O, 300 MHz, [ppm]):  $\delta$  9.30 (d, 1H, 2-CH=O), 7.38 (d, 1H, H-3), 6.53 (dd, 1H, H-4), 4.55 (d, 2H, 5-CH<sub>2</sub>OH).  $^{13}\text{C}$  NMR (D<sub>2</sub>O, 75.47 MHz, [ppm]):  $\delta$  180.38 (2-CH=O), 161.32 (C-5), 151.74 (C-2), 126.86 (C-3), 11.93 (C-4), 55.99 (5-CH<sub>2</sub>OH).

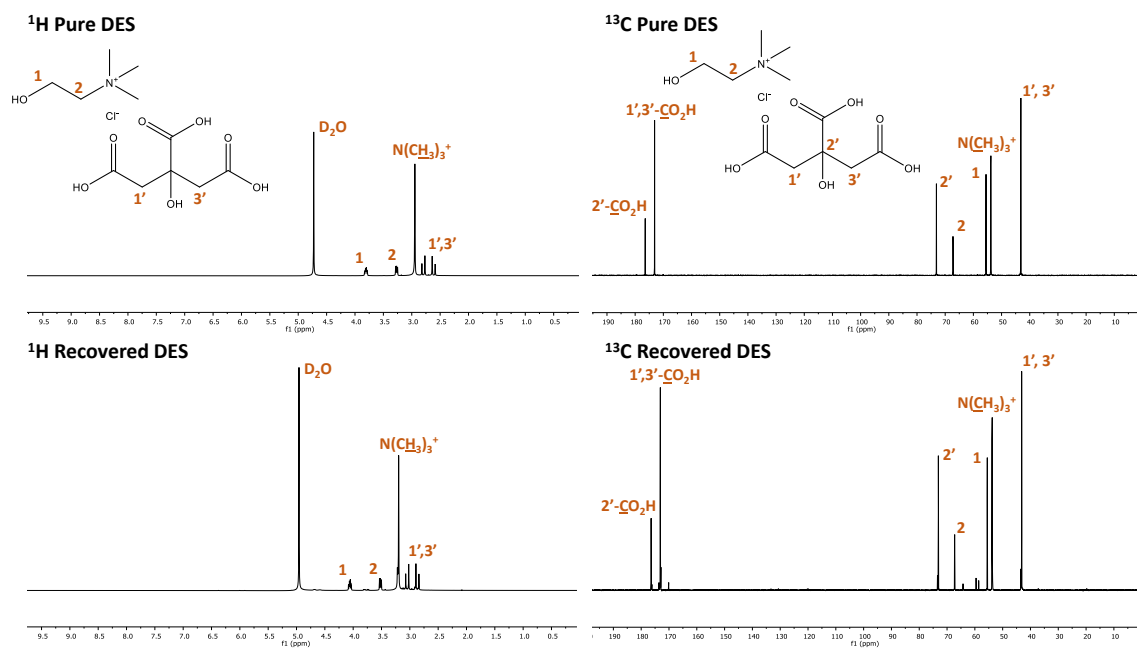

**Figure S3.** <sup>1</sup>H and <sup>13</sup>C NMR spectra of the pure and recovered [Ch]Cl:CA.
